# Supplementary material for: Diamond as Insulation for Conductive Diamond—A Spotted Pattern Design for Miniaturized Disinfection Devices
Source: MDPI journal article supplement (doi:10.3390/c9030078), 2023-08-18

## **Supplementary Material**

### **Diamond as Insulation for Conductive Diamond – A Spotted**

### **Pattern Design for Miniaturized Disinfection Devices**

#### **Index**

|                                                          |   |
|----------------------------------------------------------|---|
| 1. Manufacturing Route of the DDL wire .....             | 2 |
| 2. Raw SEM Image of Figure 4.....                        | 2 |
| 3. Raw SEM Image of Figure 5.....                        | 3 |
| 4. Raw SEM Image of Figure 6.....                        | 3 |
| 5. EDX Measurements of layers shown in Figure 6 (d)..... | 4 |
| 6. Raman Spectra of the UDD and BDD layers .....         | 5 |

## 1. Manufacturing Route of the DDL wire

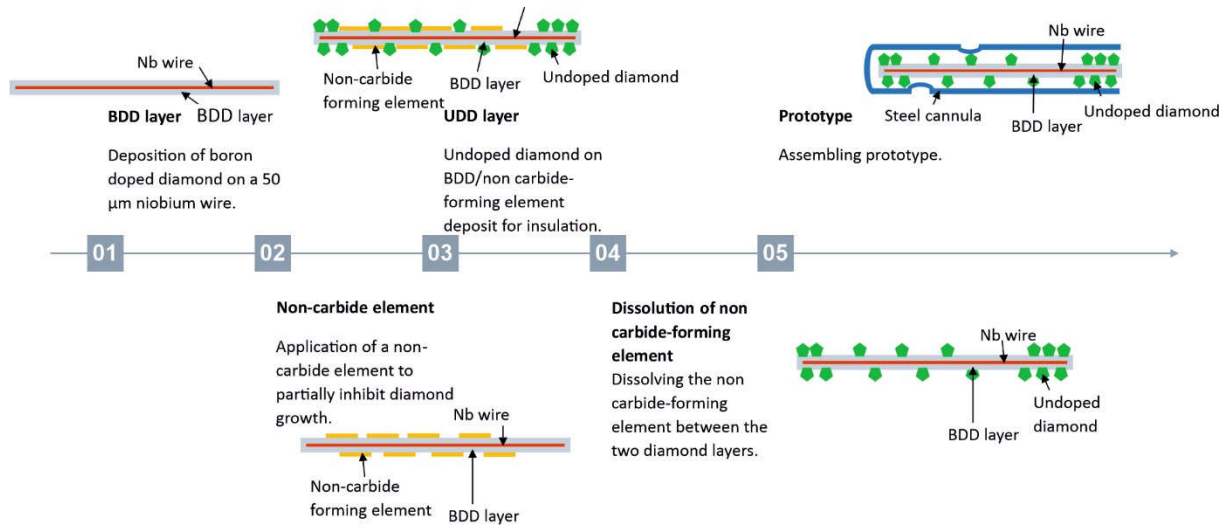

## 2. Raw SEM Image of Figure 4

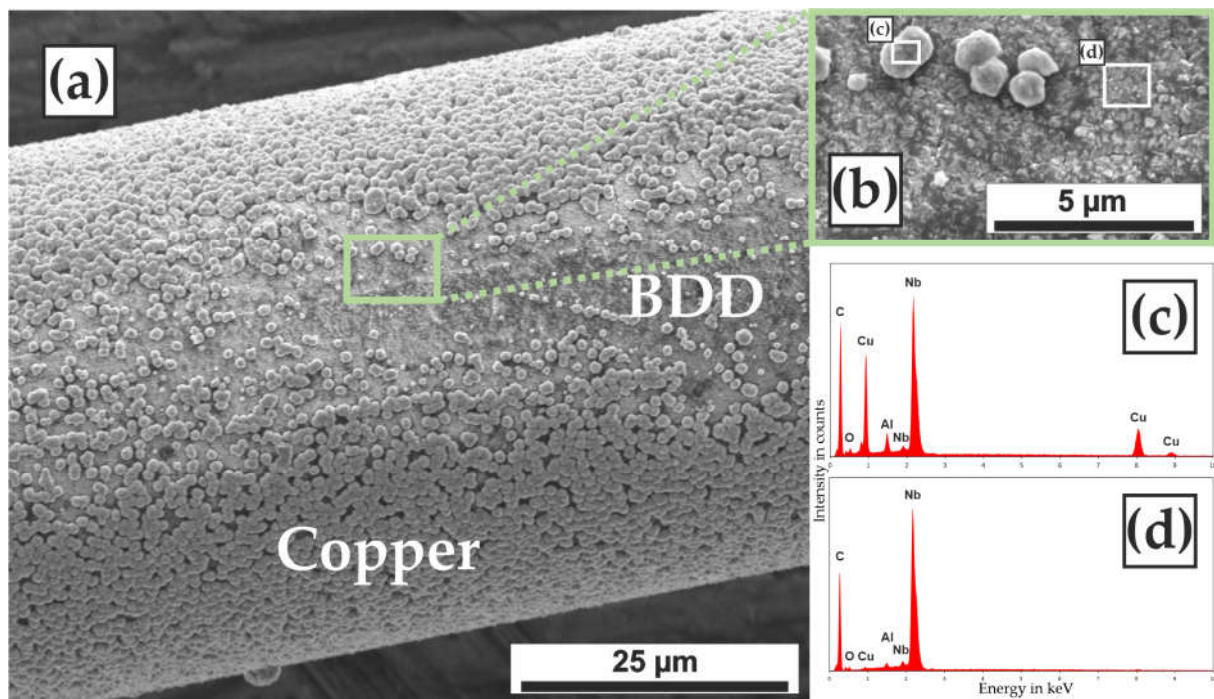

3. Raw SEM Image of Figure 5

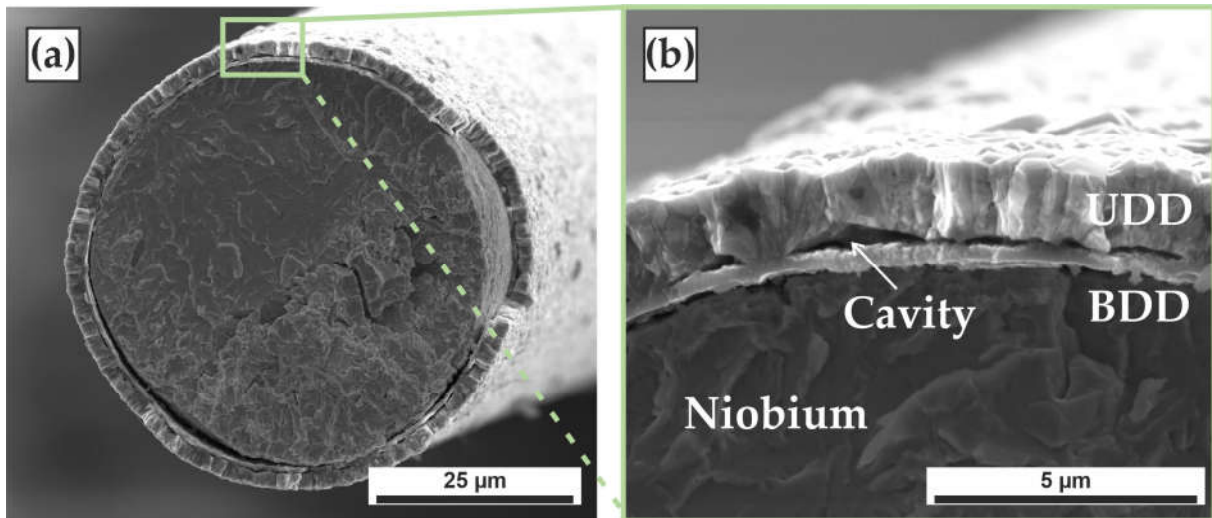

4. Raw SEM Image of Figure 6

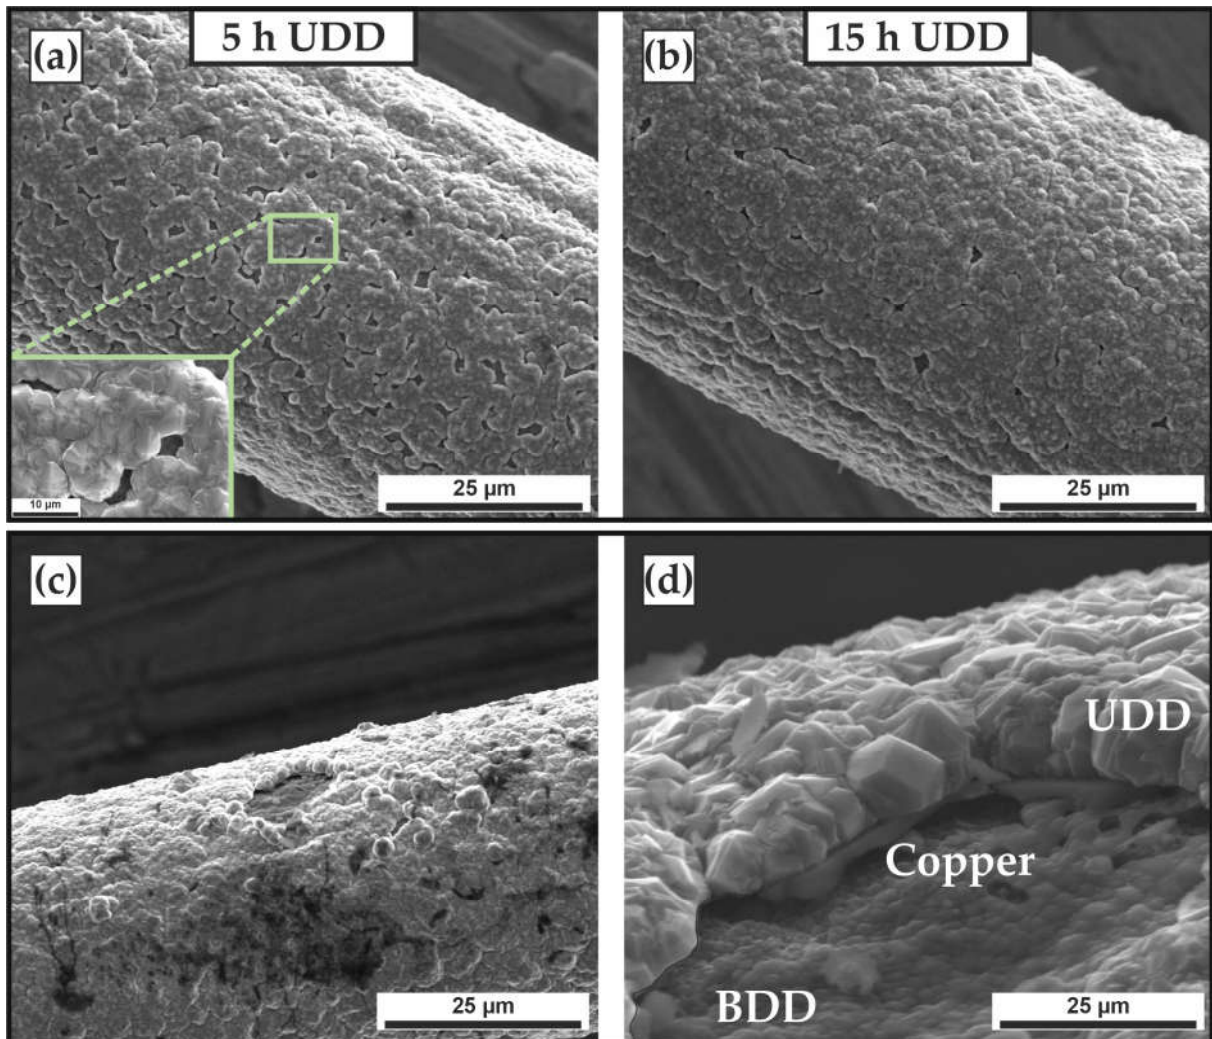

5. EDX Measurements of layers shown in Figure 6 (d)

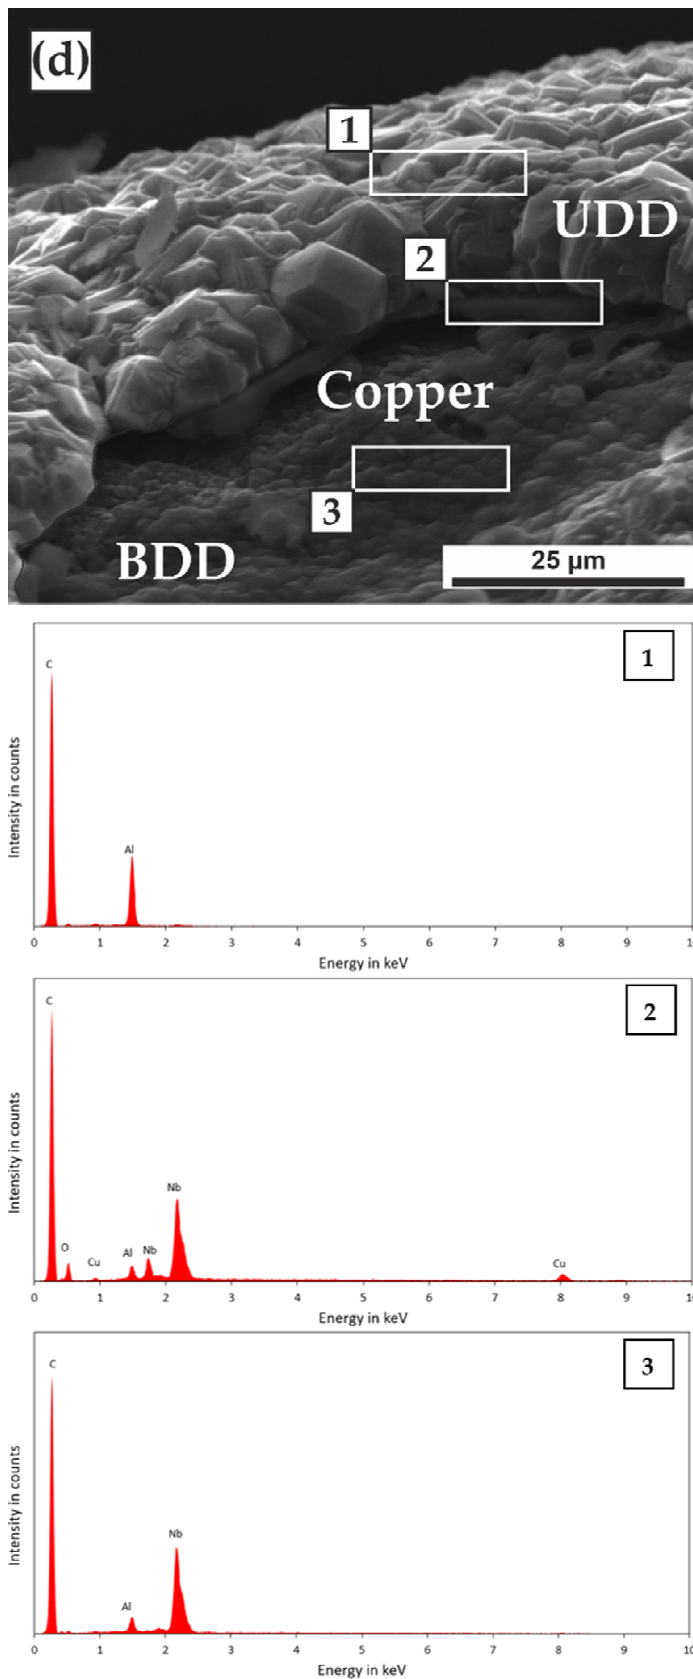

The aluminium signal is attributed to the quite rudimentary sample holder setup. The DDL wires were placed on an aluminium plate and fixed with SEM compatible adhesive tape (Al-based).

6. Raman Spectra of UDD and BDD layers

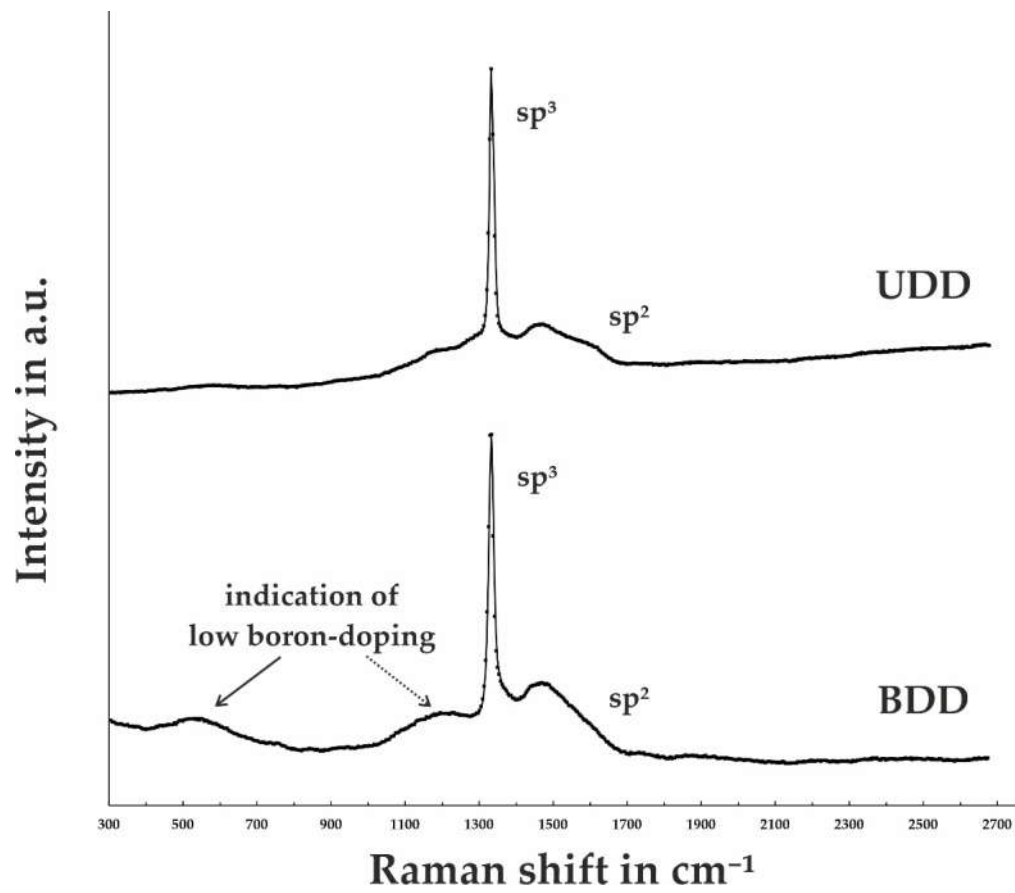

Supplement: s1 [file s1]
